# Supplementary figures and images for: Reconstruction of Complex Maxillary Defects Using Patient-specific 3D-printed Biodegradable Scaffolds
Source: PubMed Central journal article supplement — Plast Reconstr Surg Glob Open. 2018 Nov 13;6(11):e1975. doi: 10.1097/GOX.0000000000001975 (PMC6414092; doi:10.1097/gox.0000000000001975), 2018-11-13

**a**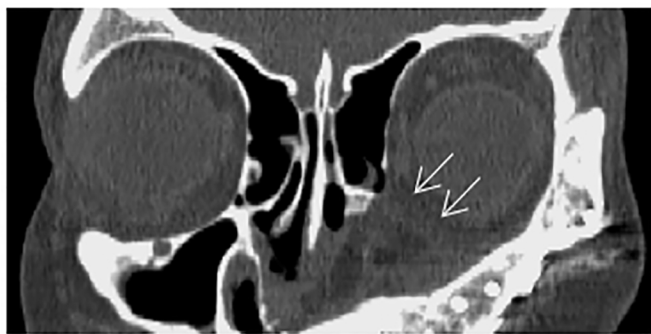**b**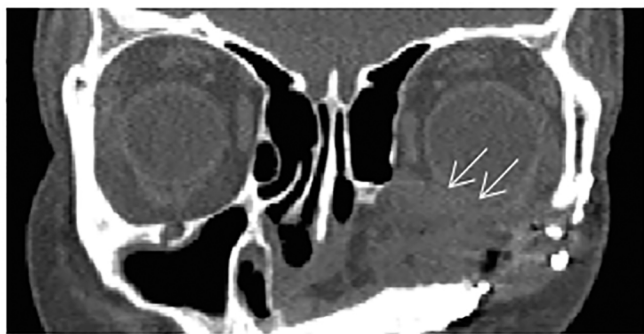**c**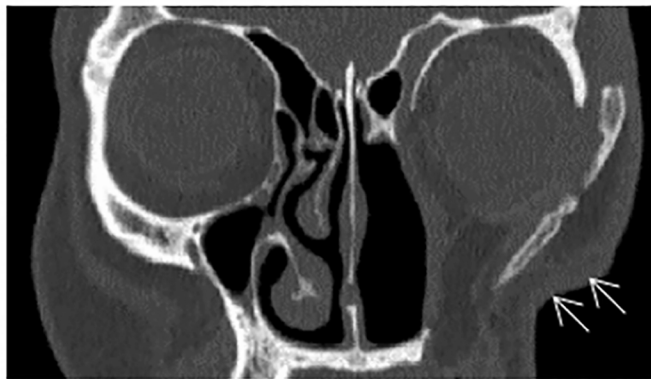**d**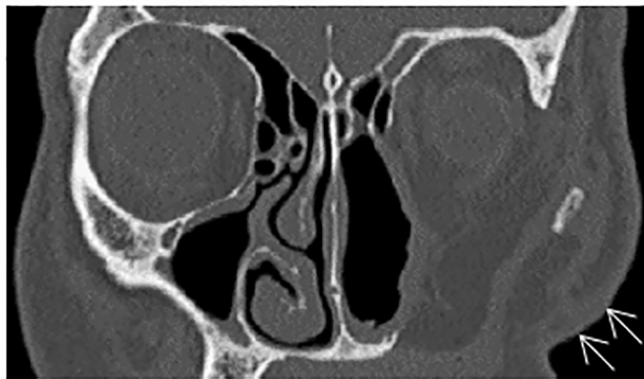**e**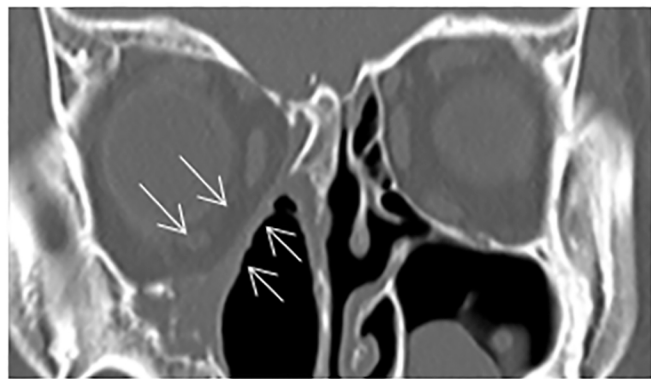**f**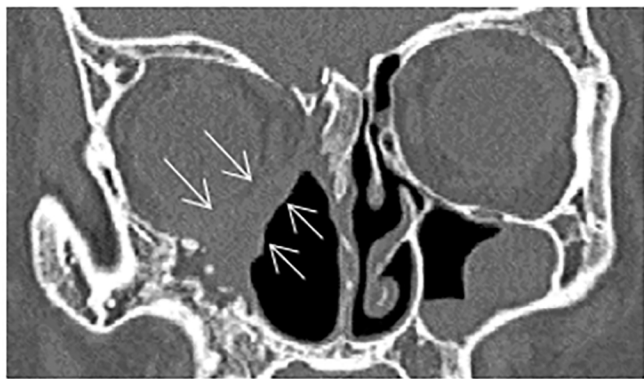

Supplement: gox-6-e1975-s003.pdf [file gox-6-e1975-s003.pdf]
